# Supplementary material for: Identifying and prioritising climate change adaptation actions for greater one-horned rhinoceros (Rhinoceros unicornis) conservation in Nepal
Source: PeerJ. 2022 Jan 10;10:e12795. doi: 10.7717/peerj.12795 (PMC8757373; doi:10.7717/peerj.12795)
Supplement: Supplemental Information 4 [file peerj-10-12795-s004.xlsx]

## Sheet: Analysis
Age group	No. of respondents							Experience	No. of respondents
18-30 Years	4							<5 years	5
31-40 Years	16							5 to 15 years	17
41-50 Years	23							>15 years	31
> 50 Years	10							Total	53
Total	53
Gender	No. of respondents							Perception on impacts of climate change	No. of respondents
Male	48							Climate change impacts	44
Female	5							Natural changes	5
Total	53							Do not know	4
								Total	53
Affliation	No. of respondents
Government organisation	29							Perception on shift in habitat	No. of respondents
Non-government organisation	12							Habitat shift due to climate change	35
Community organisation	12							Habitat shift due to unknown reasons	11
Total	53							Do not know	7
								Total	53
