# Supplementary material for: Identifying and prioritising climate change adaptation actions for greater one-horned rhinoceros (Rhinoceros unicornis) conservation in Nepal
Source: PeerJ. 2022 Jan 10;10:e12795. doi: 10.7717/peerj.12795 (PMC8757373; doi:10.7717/peerj.12795)
Supplement: Supplemental Information 5 [file peerj-10-12795-s005.xlsx]

## Sheet: Analysis
Age group	No. of respondents							Experience	No. of respondents
18-30 Years	2							<5 years	0
31-40 Years	3							5 to 15 years	2
41-50 Years	7							>15 years	15
> 50 Years	5							Total	17
Total	17
Gender	No. of respondents							Adaptation actions	Average priority score
Male	15							a. Expand the existing protected areas	2
Female	2							b. Establish new protected areas	0.29
Total	17							c. Mange grasslands	4.94
								d. Manage wetlands	5.06
								e. Practice controlled burning	0.24
								f. Control invasive species	2.35
								g. Restore corridor and connectivity	2.94
								h. Identify and protect climate refugia	6.06
								i. Design and construct earthen mounds in floodplain grasslands	4.47
								j. Conserve biodiversity at landscape level	0.29
								k. Manage buffer zone	0.35
								l. Prepare species conservatio action plan	0.24
								m. Integrate climate change impacts in species conservation action plan	4.41
								n. Translocate species to other suitable habitats	0.18
Affliation	No. of respondents							o. Translocate species to future suitable habitat	4.71
Government organisation	11							p. Strengthen anti-poaching operation	0.53
Non-government organisation	4							q. Control water pollution	0.76
Community organisation	2							r. Mitigate human-wildlife conflicts	0.35
Total	17							s. Conduct periodic census and Id-based monitoring	0.47
								t. Initiate experimental research and monitoring of climate change effects	4.35
